# Supplementary material for: The systemic inflammation indexes predict all-cause mortality in peritoneal dialysis patients
Source: PubMed Central journal article supplement (PMC10332209; doi:10.1080/0886022x.2022.2160348), 2023-07-07
Supplement: IRNF_A_2160348_SM6455.pdf [file IRNF_A_2160348_SM6455.pdf]

Supplement Table 1. Optimal cut-off values and AUC of CRP, NLR, MLR and PLR.

|     | Cut-off value | AUC (95% CI)         | <i>P</i> -value | Sensitivity (%) | Specificity (%) |
|-----|---------------|----------------------|-----------------|-----------------|-----------------|
| CRP | >6.2          | 0.599 (0.515, 0.683) | 0.021           | 56.9            | 66.4            |
| NLR | >4.99         | 0.634 (0.561, 0.708) | <0.001          | 53.8            | 74.7            |
| MLR | >0.2168       | 0.615 (0.542, 0.688) | 0.002           | 90.8            | 30.6            |
| PLR | >132.05       | 0.643 (0.571, 0.716) | <0.001          | 75.4            | 51.3            |

CRP: C-reactive protein; IL-6: interleukin-6; NLR: neutrophil to lymphocyte ratio;

MLR: monocyte to lymphocyte ratio; PLR: platelet to lymphocyte ratio.
